# Supplementary material
Source: PubMed Central journal article supplement (PMC9026246)
Supplement: jamaoncol-e220114-s001.pdf [file jamaoncol-e220114-s001.pdf]

## Supplemental Online Content

Jagsi R, Griffith KA, Vicini F, et al; Michigan Radiation Oncology Quality Consortium. Identifying patients whose symptoms are underrecognized during treatment with breast radiotherapy. *JAMA Oncol*. Published online April 21, 2022. doi:10.1001/jamaoncol.2022.0114

**eTable 1.** Characteristics of the 9,941 Patients Who Report At Least One Patient-Reported Outcomes Survey during the period on treatment to end of treatment assessment

**eTable 2.** Detailed Evaluation of Concordance Between Physician and Patient Ratings of Pain for 37,248 Paired Observations of Pain

This supplemental material has been provided by the authors to give readers additional information about their work.

**eTable 1: Characteristics of the 9,941 Patients Who Report At Least One Patient-Reported Outcomes Survey during the period on treatment to end of treatment assessment.**

| <b>Variable/Level</b>        | <b>All<br/>(N=9,941)<br/>N (column %)</b> | <b>At least one substantial<br/>symptom reported<br/>(N=5,783)<br/>N (column %) [row %]</b> | <b>No substantial symptoms reported<br/>(N=4,158)<br/>N (column %) [row %]</b> |
|------------------------------|-------------------------------------------|---------------------------------------------------------------------------------------------|--------------------------------------------------------------------------------|
| Age Group:                   |                                           |                                                                                             |                                                                                |
| <50                          | 1595 (16.0)                               | 1146 (19.8) [71.8]                                                                          | 449 (10.8) [28.2]                                                              |
| 50-59                        | 2874 (28.9)                               | 1881 (32.5) [65.4]                                                                          | 993 (23.9) [34.6]                                                              |
| 60-69                        | 3353 (33.7)                               | 1791 (31.0) [53.4]                                                                          | 1562 (37.6) [46.6]                                                             |
| 70+                          | 2119 (21.3)                               | 965 (16.7) [45.5]                                                                           | 1154 (27.8) [54.5]                                                             |
| BMI Category                 |                                           |                                                                                             |                                                                                |
| Underweight <18.5            | 166 (1.7)                                 | 98 (1.7) [59.0]                                                                             | 68 (1.6) [41.0]                                                                |
| Normal 18.5-<25              | 2252 (22.7)                               | 1188 (20.5) [52.8]                                                                          | 1064 (25.6) [47.2]                                                             |
| Overweight 25-<30            | 3024 (30.4)                               | 1667 (28.8) [55.1]                                                                          | 1357 (32.6) [44.9]                                                             |
| Obesity I 30-<35             | 2286 (23.0)                               | 1329 (23.0) [58.1]                                                                          | 957 (23.0) [41.9]                                                              |
| Obesity II 35-<40            | 1239 (12.5)                               | 791 (13.7) [63.8]                                                                           | 448 (10.8) [36.2]                                                              |
| Obesity III >40              | 974 (9.8)                                 | 710 (12.3) [72.9]                                                                           | 264 (6.4) [27.1]                                                               |
| Racial group:                |                                           |                                                                                             |                                                                                |
| Black                        | 1655 (16.6)                               | 1118 (19.3) [67.6]                                                                          | 537 (12.9) [32.4]                                                              |
| White                        | 7925 (79.7)                               | 4456 (77.1) [56.2]                                                                          | 3469 (83.4) [43.8]                                                             |
| Other                        | 361 (3.6)                                 | 209 (3.6) [57.9]                                                                            | 152 (3.6) [42.1]                                                               |
| Supraclavicular field used:  |                                           |                                                                                             |                                                                                |
| No reported                  | 116 (1.2)                                 | 70 (1.2) [60.3]                                                                             | 46 (1.1) [39.7]                                                                |
| No                           | 8721 (87.7)                               | 4960 (85.8) [56.9]                                                                          | 3761 (90.5) [43.1]                                                             |
| Yes                          | 1104 (11.1)                               | 753 (13.0) [68.2]                                                                           | 351 (8.4) [31.8]                                                               |
| Fractionation:               |                                           |                                                                                             |                                                                                |
| Not reported                 | 162 (1.6)                                 | 93 (1.6) [57.4]                                                                             | 69 (1.7) [42.6]                                                                |
| Conventional                 | 4449 (44.8)                               | 3029 (52.4) [68.1]                                                                          | 1420 (34.2) [31.9]                                                             |
| Hypofractionated             | 5330 (53.6)                               | 2661 (46.0) [49.9]                                                                          | 2669 (64.2) [50.1]                                                             |
| Boost used:                  |                                           |                                                                                             |                                                                                |
| Not reported                 | 162 (1.6)                                 | 93 (1.6) [57.4]                                                                             | 69 (1.7) [42.6]                                                                |
| No                           | 1678 (16.9)                               | 722 (12.5) [43.0]                                                                           | 956 (23.0) [57.0]                                                              |
| Yes                          | 8101 (81.5)                               | 4968 (85.9) [61.3]                                                                          | 3133 (75.3) [38.7]                                                             |
| Academic treatment facility: |                                           |                                                                                             |                                                                                |
| No                           | 6359 (64.0)                               | 3667 (63.4) [57.7]                                                                          | 2692 (64.7) [42.3]                                                             |
| Yes                          | 3582 (36.0)                               | 2116 (36.6) [59.1]                                                                          | 1466 (35.3) [40.9]                                                             |
| Gender of treating provider: |                                           |                                                                                             |                                                                                |
| Female                       | 3367 (33.9)                               | 2033 (35.2) [60.4]                                                                          | 1334 (32.1) [39.6]                                                             |
| Male                         | 6574 (66.1)                               | 3750 (64.8) [57.0]                                                                          | 2824 (67.9) [43.0]                                                             |

**eTable 1: Characteristics of the 9,941 Patients Who Report At Least One Patient-Reported Outcomes Survey during the period on treatment to end of treatment assessment.**

| <b>Variable/Level</b>       | <b>All<br/>(N=9,941)<br/>N (column %)</b> | <b>At least one substantial<br/>symptom reported<br/>(N=5,783)<br/>N (column %) [row %]</b> | <b>No substantial symptoms reported<br/>(N=4,158)<br/>N (column %) [row %]</b> |
|-----------------------------|-------------------------------------------|---------------------------------------------------------------------------------------------|--------------------------------------------------------------------------------|
| Moderate/Severe Breast pain |                                           |                                                                                             |                                                                                |
| No                          | 6505 (65.4)                               | 2347 (40.6) [36.1]                                                                          | 4158 (100.0) [63.9]                                                            |
| Yes                         | 3436 (34.6)                               | 3436 (59.4) [100]                                                                           | 0                                                                              |
| Bother itching              |                                           |                                                                                             |                                                                                |
| No                          | 6900 (69.4)                               | 2742 (47.4) [39.7]                                                                          | 4158 (100.0) [60.3]                                                            |
| Yes                         | 3041 (30.6)                               | 3041 (52.6) [100]                                                                           | 0                                                                              |
| Bother swelling             |                                           |                                                                                             |                                                                                |
| No                          | 7578 (76.2)                               | 3420 (59.1) [45.1]                                                                          | 4158 (100.0) [54.9]                                                            |
| Yes                         | 2363 (23.8)                               | 2363 (40.9) [100]                                                                           | 0                                                                              |
| Fatigue                     |                                           |                                                                                             |                                                                                |
| No                          | 7732 (77.8)                               | 3574 (61.8) [46.2]                                                                          | 4158 (100.0) [53.8]                                                            |
| Yes                         | 2209 (22.2)                               | 2209 (38.2) [100]                                                                           | 0                                                                              |

a Racial identities are based on self-report; Black includes patients who indicated “Black” or “African American”; Other includes all other racial identities.

**eTable 2: Detailed Evaluation of Concordance Between Physician and Patient Ratings of Pain for 37,248 Paired Observations of Pain\***

| Physician CTCAE Breast Pain | Patient Breast Pain Rating (maximum of the BPI questions): |                    |                        |                            |                           |
|-----------------------------|------------------------------------------------------------|--------------------|------------------------|----------------------------|---------------------------|
|                             | N, mean (median) [IQR]                                     | No Pain (0): N (%) | Mild Pain (1-3): N (%) | Moderate Pain (4-6): N (%) | Severe Pain (7-10): N (%) |
| 0                           | 21027, 0.80 (0) [0-1]                                      | 12896 (61.3)       | 6973 (33.2)            | 884 (4.2)                  | 274 (1.3)                 |
| 1                           | 14132, 2.63 (2) [1-4]                                      | 1596 (11.3)        | 8681 (61.4)            | 2919 (20.7)                | 936 (6.6)                 |
| 2                           | 1965, 5.92 (6) [4-8]                                       | 44 (2.2)           | 270 (13.7)             | 766 (39.0)                 | 885 (45.0)                |
| 3                           | 124, 8.11 (9) [7.5-10]                                     | 1 (0.8)            | 6 (4.8)                | 12 (9.7)                   | 105 (84.7)                |

\*Using the 37,593 paired observation timepoints between patient assessments and physician assessments of acute toxicity, there are 37,248 paired measurements for pain (patient modified brief pain inventory, 0 – 10 scale and physician CTCAE Grade 0-3 Breast Pain). The patient pain score has been summarized by the level of physician assessment in the table. As detailed in the text, there is a strong association ( $P < 0.001$ ) between physician and patient rating. The rank correlation (Spearman) between physician CTCAE and the patient score groups as above (No Pain, Mild, Moderate, Severe) is 0.58, suggesting a strong positive correlation as would be expected a priori. Nevertheless, a substantial proportion of patients who experienced substantial symptoms had under-recognition, as detailed in the manuscript.
