# Supplementary material
Source: PubMed Central journal article supplement (PMC9026246)
Supplement: jamaoncol-e220114-s002.pdf [file jamaoncol-e220114-s002.pdf]

Supplemental Online Content: Nonauthor Collaborators

\*First name, last name, and suffix (if applicable) are required and will appear in PubMed.

| <b>*Group Name(s):</b> Michigan Radiation Oncology Quality Consortium |                   |                              |                  |                              |                                          |                                                         |                                                                                            |
|-----------------------------------------------------------------------|-------------------|------------------------------|------------------|------------------------------|------------------------------------------|---------------------------------------------------------|--------------------------------------------------------------------------------------------|
| <b>*First Name and Middle Initial(s)</b>                              | <b>*Last Name</b> | <b>*Suffix (eg, Jr, III)</b> | Academic Degrees | Institution                  | Location (city, state/province, country) | Role or Contribution, eg, chair, principal investigator | Group (if more than 1 Group listed in the byline) and/or Subgroup (eg, Steering Committee) |
| Melissa A.                                                            | Mietzel           |                              | MS               | University of Michigan       | Ann Arbor, MI, USA                       | MROQC Program Manager                                   | Executive Committee                                                                        |
| Deborah                                                               | Duseau            |                              | BS, RT(T)        | Henry Ford Allegiance Health | Jackson, MI, USA                         | Site Administrator                                      | Executive Committee                                                                        |
| Kaitlyn                                                               | Baldwin           |                              | RN BSN           | Munson Medical Center        | Traverse City, MI, USA                   | Clinical Data Abstractor                                | Executive Committee                                                                        |
| David                                                                 | Heimbürger        |                              | MD               | Munson Medical Center        | Traverse City, MI, USA                   | Clinical Champion                                       | Executive Committee                                                                        |
| Matthew                                                               | Schipper          |                              | PhD              | University of Michigan       | Ann Arbor, MI, USA                       | Statistician                                            | Executive Committee                                                                        |
| Martha                                                                | Matuszak          |                              | PhD              | University of Michigan       | Ann Arbor, MI, USA                       | Medical Physicist; MROQC Co-Director                    | Executive Committee                                                                        |
| Eyad                                                                  | Abu-Isa           |                              | MD               | Asension Providence          | Southfield, MI, USA                      | Clinical Champion                                       | Executive Committee                                                                        |
| Vrinda                                                                | Narayana          |                              | PhD              | Asension Providence          | Southfield, MI, USA                      | Medical Physicist                                       | Executive Committee                                                                        |
